# Supplementary material for: Bacterial community composition and fhs profiles of low- and high-ammonia biogas digesters reveal novel syntrophic acetate-oxidising bacteria
Source: PubMed Central journal article supplement (PMC4769498; doi:10.1186/s13068-016-0454-9), 2016-02-27

**Control digester SAO1**

**Experimental digester SAO3**

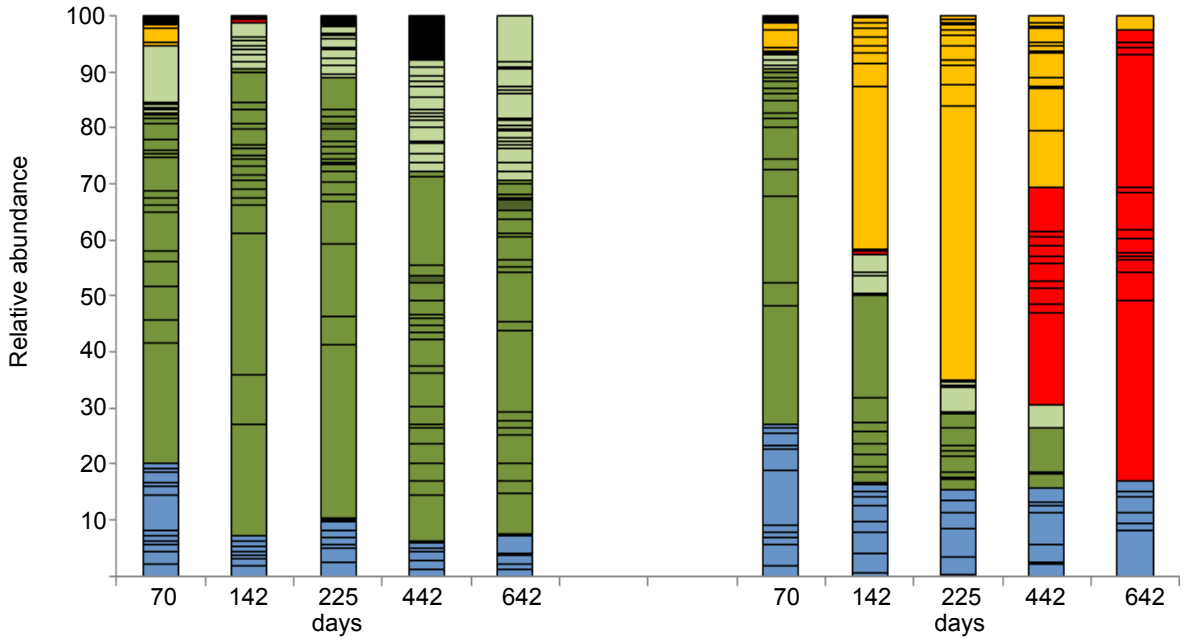

### control

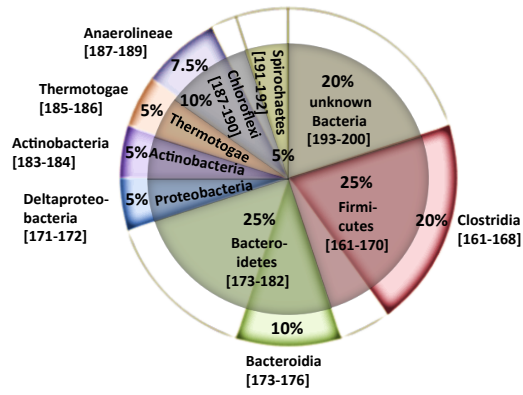

### NH<sub>4</sub><sup>+</sup>-N stressed

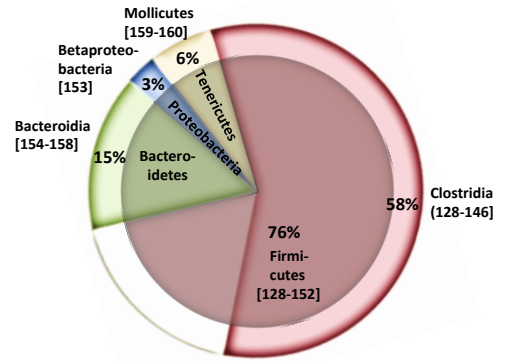

Supplement: 13068_2016_454_MOESM7_ESM.pdf [file 13068_2016_454_MOESM7_ESM.pdf]
